# Supplementary material for: Biological Durability of Acetylated Hornbeam Wood with Soil Contact in Hungary
Source: MDPI journal article supplement (doi:10.3390/f13071003), 2022-06-25
Supplement: s1 [file s1]

**Table S1.** Average monthly breakdown of weather parameters.

| <b>2016-2022</b>                                          | Jan        | Feb        | Mar        | Apr        | May        | Jun        | Jul        | Aug        | Sep        | Oct        | Nov        | Dec       |
|-----------------------------------------------------------|------------|------------|------------|------------|------------|------------|------------|------------|------------|------------|------------|-----------|
| Temperature (°C)<br>AVG: 12                               | 1          | 4          | 7          | 12         | 15         | 21         | 22         | 22         | 17         | 12         | 6          | 3         |
| Precipitation (mm)<br>SUM: 594                            | 25         | 26         | 27         | 26         | 85         | 63         | 72         | 65         | 67         | 54         | 46         | 37        |
| Sunshine duration (hours)<br>SUM: 2455                    | 93         | 136        | 208        | 259        | 263        | 316        | 316        | 283        | 241        | 171        | 94         | 77        |
| Solar irradiance (kJ/m2)<br>SUM: 4 684 884                | 101<br>667 | 175<br>126 | 321<br>607 | 531<br>745 | 606<br>839 | 710<br>422 | 704<br>531 | 596<br>590 | 438<br>774 | 268<br>241 | 130<br>844 | 98<br>498 |
| Relative humidity (%)<br>AVG: 70                          | 78         | 70         | 61         | 58         | 68         | 63         | 62         | 65         | 70         | 77         | 84         | 81        |
| Number of days with precipitation above 0.25mm<br>SUM: 93 | 9          | 8          | 6          | 7          | 13         | 9          | 11         | 8          | 8          | 10         | 10         | 11        |

**Table S2.** Annual breakdown of weather parameters.

| <b>Year</b> | <b>Temperature (°C)</b> | <b>Precipitation (mm)</b> | <b>Sunshine duration (hours)</b> | <b>Solar irradiance (kJ/m2)</b> | <b>Relative humidity (%)</b> |
|-------------|-------------------------|---------------------------|----------------------------------|---------------------------------|------------------------------|
| 1           | 10.9                    | 578.3                     | 2 383                            | 4 674 094                       | 71                           |
| 2           | 11.2                    | 617.3                     | 2 270                            | 4 631 248                       | 71                           |
| 3           | 12.8                    | 662.4                     | 2 589                            | 4 947 175                       | 70                           |
| 4           | 12.5                    | 603.0                     | 2 463                            | 4 775 909                       | 70                           |
| 5           | 11.6                    | 606.8                     | 2 428                            | 4 796 732                       | 71                           |
| 6           | 11.7                    | 493.4                     | 2 597                            | 4 284 145                       | 66                           |
| Average     | 11.8                    | 593.5                     | 2 455                            | 4 684 884                       | 70                           |
